# Supplementary material for: Enthalpies of Combustion and Formation of Histidine Stereoisomers
Source: Hindawi journal article supplement (doi:10.1155/2018/7801381), 2018-12-06
Supplement: f1 [file 7801381.f1.doc]

**Supplementary materials**

**Enthalpies of combustion and formation of histidine stereoisomers**

A. Neacsu1, D. Gheorghe1, I. Contineanu1, A.M. Sofronia1, F. Teodorescu2 and St. Perişanu3

*1Institute of Physical Chemistry “Ilie Murgulescu” of the Romanian Academy, 202 Splaiul*

*Independentei st. 060021, Bucharest, Romania*

*2Centre of Organic Chemistry “C.D. Nenitescu” of the Romanian Academy, 202 B Splaiul*

*Independentei st., 060023, Bucharest, Romania*

*3Department of General Chemistry, Polytechnic University of Bucharest, 1 st. Polizu, Bucharest, Romania*

Corresponding author

stefan.perisanu@upb.ro (Stefan Perisanu)

gheorghedanny2@gmail.com (Daniela Gheorghe)

**Table 1.** Sample purity calculated with the Calisto software of DSC

| Isomeric histidines | DSC | |
| --- | --- | --- |
| Purity (%) | *T* melting of the pure substance (°C) |
| L-histidine | 99.25 | 286.94 |
| D-histidine | 98.86 | 285.46 |
| DL-histidine | 99.06 | 281.80 |

**Table 2.** Results of combustion experiments for L-histidine(solid) at *T*= 298.15 K*

| Sample | 1 | 2 | 3 | 4 | 5 | 6 |
| --- | --- | --- | --- | --- | --- | --- |
| *m*sample/g | 0.094692 | 0.079662 | 0.082306 | 0.08124 | 0.058666 | 0.104344 |
| *m*wire/g | 0.006204 | 0.005436 | 0.002207 | 0.00641 | 0.003591 | 0.004522 |
| *m*cotton/g | 0.004484 | 0.004438 | 0.003701 | 0.003411 | 0.004672 | 0.004029 |
| *Tc/*K | 0.8915 | 0.7556 | 0.7653 | 0.7646 | 0.5650 | 0.9703 |
| *ε*cont(-*T*c)/J | -0.12 | -0.09 | -0.09 | -0.09 | -0.05 | -0.14 |
| *ε*calor(-*T*c)/J | -2074.42 | -1758.2 | -1780.77 | -1779.14 | -1314.69 | -2257.78 |
| *Udecomp*HNO3/J | 8.51 | 7.97 | 7.85 | 7.17 | 5.17 | 9.36 |
| *U*corr/J | 3.56 | 4.18 | 4.1 | 4.15 | 3.5 | 3.19 |
| -*m*wire*cu*wire/J | 36.34 | 31.84 | 12.93 | 37.55 | 21.03 | 26.49 |
| -*m*cotton*cu*cotton/J | 74.43 | 73.67 | 61.43 | 56.62 | 77.55 | 66.88 |
| *cu*/Jg-1 | -20611.1 | -20594.8 | -20588.4 | -20602.4 | -20582.4 | -20624.2 |
| *cU*/kJmol-1 | -3197.8 | -3195.3 | -3194.3 | -3196.5 | -3193.4 | -3199.8 |
| <*cU*/ kJmol-1> | -(3196.2±2.4) | | | | | |

**m*sample– sample mass, *m*wire– mass of the ignition wire, *m*cotton– mass of the cotton fuse. *V*(bomb) = 22 mL is the internal volume of the calorimetric bomb, *m*i(H2O) = 0.5 g is the mass of water added to the bomb for dissolution of combustion gases; the pressure of oxygen in the bomb was 3.55±0.01 MPa, D*Tc*– corrected temperature rise due to combustion, *ε*calor– energy equivalent of the calorimeter, *ε*cont– energy equivalent of the bomb contents, *u*cotton– energy of combustion of the cotton fuse, *Udecomp*HNO3– energy required for decomposition of the HNO3 solution formed, *U*corr– the correction to standard states (the sum of Washburn’s corrections), *cu*– massic standard energy of combustion,<*cU*>– mean value of standard molar energy of combustion, uncertainty represent the standard deviation of the mean, *u*(*m*) = 0.000002 g, *u*(*T*)=10-4 K

**Table 3.** Results of combustion experiments for D-histidine(solid) at *T*= 298.15 K*

| Sample | 1 | 2 | 3 | 4 | 5 | 6 | 7 |
| --- | --- | --- | --- | --- | --- | --- | --- |
| *m*sample/g | 0.119473 | 0.110891 | 0.12479 | 0.086992 | 0.084032 | 0.069613 | 0.079075 |
| *m*wire/g | 0.002399 | 0.002411 | 0.002667 | 0.002912 | 0.002088 | 0.00239 | 0.001991 |
| *m*cotton/g | 0.004966 | 0.012389 | 0.007754 | 0.004532 | 0.003261 | 0.004966 | 0.004894 |
| *m*aux/g | 0 | 0 | 0 | 0 | 0 | 0 | 0.19588 |
| *Tc/*K | 1.1064 | 1.0825 | 1.1744 | 0.8140 | 0.7784 | 0.6631 | 0.9682 |
| *ε*cont(-*T*c)/J | -0.18 | -0.16 | -0.20 | -0.10 | -0.09 | -0.06 | -0.12 |
| *ε*calor(-*T*c)/J | -2574.47 | -2519.02 | -2732.7 | -1894.03 | -1811.25 | -1543.02 | -2285.83 |
| *Udecomp*HNO3/J | 10.21 | 10.66 | 11.47 | 8.35 | 7.38 | 6.41 | 8.01 |
| -*U*corr/J | 2.51 | 2.61 | 2.19 | 3.76 | 4.04 | 4.58 | 3.10 |
| -*m*auxΔc*u*oaux/J | 0 | 0 | 0 | 0 | 0 | 0 | 519.18 |
| -*m*wire*cu*wire/J | 14.05 | 14.12 | 15.62 | 17.06 | 12.23 | 14.05 | 11.66 |
| -*m*cotton*cu*cotton/J | 82.43 | 205.65 | 128.71 | 73.60 | 54.13 | 82.43 | 81.24 |
| *cu*/Jg-1 | -20636.0 | -20614.6 | -20633.9 | -20592.3 | -20629.7 | -20621.8 | -20610.3 |
| *cU*/kJmol-1 | -3201.8 | -3198.4 | -3201.3 | -3195.1 | -3200.7 | -3199.5 | -3197.9 |
| <*cU*/ kJmol-1> | -(3199.2±2.3) | | | | | |  |

*The symbols have the same meaning as in Table 2. *m*aux/g is the mass of the benzoic acid used as Δc*u*oaux being its specific energy of combustion

**Table 4.** Results of combustion experiments for DL-histidine(solid) at *T*= 298.15 K*

| Sample | 1 | 2 | 3 | 4 | 5 | 6 |
| --- | --- | --- | --- | --- | --- | --- |
| *m*sample/g | 0.125320 | 0.133405 | 0.078256 | 0.112803 | 0.099432 | 0.126456 |
| *m*wire/g | 0.003107 | 0.002086 | 0.002477 | 0.003559 | 0.002807 | 0.002955 |
| *m*cotton/g | 0.005301 | 0.005297 | 0.008230 | 0.004866 | 0.006119 | 0.004859 |
| *Tc/*K | 1.1611 | 1.2301 | 0.7615 | 1.0484 | 0.9358 | 1.1677 |
| *ε*cont(-*T*c)/J | -0. 2 | -0.22 | -0.08 | -0.16 | -0.13 | -0.2 |
| *ε*calor(-*T*c)/J | -2701.75 | -2862.31 | -1771.93 | -2439.51 | -2177.5 | -2717.11 |
| *Udecomp*HNO3/J | 10.86 | 11.26 | 6.73 | 9.82 | 8.17 | 10.92 |
| *U*corr/J | 2.26 | 1.89 | 4.12 | 2.8 | 3.3 | 2.22 |
| -*m*wire*cu*wire/J | 18.20 | 12.22 | 14.51 | 20.85 | 16.44 | 17.31 |
| -*m*cotton*cu*cotton/J | 87.99 | 87.93 | 136.61 | 80.77 | 101.57 | 80.66 |
| *cu*/Jg-1 | -20608.3 | -20608.2 | -20573.9 | -20615.0 | -20598.4 | -20609.6 |
| *cU*/kJmol-1 | -3197.4 | -3197.4 | -3192.0 | -3198.4 | -3195.8 | -3197.6 |
| <*cU*/ kJmol-1> | -(3196.4 ± 2.3) | | | | | |

*The symbols have the same meaning as in Table 2.
